# Supplementary material
Source: publisher figshare collection journal article supplement (https://acs.figshare.com/ndownloader/files/27686954)
Supplement: Supplementary file [file 27686954]

# Aromatic dendrimers bearing 2,4,6-triphenyl-1,3,5-triazine cores and their photocatalytic performance

## Supporting Information

Jakub S. Cyniak and Artur Kasprzak\*

Faculty of Chemistry, Warsaw University of Technology, Noakowskiego Str. 3, 00-664 Warsaw, Poland

\* corresponding author e-mail: akasprzak@ch.pw.edu.pl

### Table of CONTENTS

|      |                                                                                                                             |     |
|------|-----------------------------------------------------------------------------------------------------------------------------|-----|
| S1.  | Optimization experiments toward the synthesis of <b>D1</b> and <b>D2</b> .....                                              | S2  |
| S2.  | Compounds characterization data .....                                                                                       | S5  |
| S3.  | Photocatalytic studies .....                                                                                                | S14 |
| S3.1 | Photocatalytic synthesis of <i>N</i> -benzylidene benzylamines from benzylamines.....                                       | S14 |
| S3.2 | Determination of conversion of benzylamine based on <sup>1</sup> H NMR spectra...                                           | S16 |
| S3.3 | <sup>1</sup> H NMR spectrum of the isolated <i>N</i> -benzylidene benzylamine ( <b>6</b> ) under optimized conditions ..... | S17 |
| S3.4 | Determination of HOMO-LUMO band gaps for <b>D1</b> and <b>D2</b> .....                                                      | S18 |
| S3.5 | Plausible literature reaction mechanism .....                                                                               | S18 |
| S4.  | TGA curves for <b>D1</b> and <b>D2</b> .....                                                                                | S23 |
| S5.  | UV-Vis spectra .....                                                                                                        | S24 |
| S6.  | OLED application trials with <b>D1</b> and <b>D2</b> .....                                                                  | S25 |
| S7.  | References.....                                                                                                             | S28 |

## **S1. Optimization experiments toward the synthesis of D1 and D2**

The data for optimization experiments are summarized in Table S1 and Table S2 located below.

**Table S1.** Optimization experiments for the synthesis of **D1**.

| Entry | <b>2</b><br>(mg;<br><i>mmol</i> ;<br>equiv) | <b>3</b><br>(mg;<br><i>mmol</i> ;<br>equiv) | <b>solvent</b><br>(ml)                                        | <b>catalyst</b><br>(mg; <i>mmol</i> ;<br>equiv)                    | <b>base</b><br>(mg;<br><i>mmol</i> ;<br>equiv)      | <b>Reaction</b><br><b>time</b><br>(hours) | <b>temp.</b><br>(°C) | <b>D1</b><br><b>yield<sup>a</sup></b><br>(mg;<br>%) |
|-------|---------------------------------------------|---------------------------------------------|---------------------------------------------------------------|--------------------------------------------------------------------|-----------------------------------------------------|-------------------------------------------|----------------------|-----------------------------------------------------|
| 1     | 8.8;<br>0.02;<br>1.0                        | 21.6;<br>14.28;<br>3.5                      | PhMe<br>(2.1);<br>H <sub>2</sub> O<br>(0.7);<br>EtOH<br>(0.7) | Pd(PPh <sub>3</sub> ) <sub>4</sub><br>3.5; 0.003;<br>0.15          | Na <sub>2</sub> CO <sub>3</sub><br>21.2; 0.2;<br>10 | 24                                        | reflux               | 4.6;<br>23.0                                        |
| 2     | 8.8;<br>0.02;<br>1.0                        | 21.6;<br>0.07;<br>3.5                       | DMF<br>(3.5)                                                  | Pd(dppf)Cl <sub>2</sub><br>2.2; 0.003;<br>0.15                     | CH <sub>3</sub> COOK<br>19.6; 0.2;<br>10            | 24                                        | reflux               | 3.4;<br>17.0                                        |
| 3     | 8.8;<br>0.02;<br>1.0                        | 21.6;<br>0.07;<br>3.5                       | PhMe<br>(2.1);<br>H <sub>2</sub> O<br>(0.7);<br>EtOH<br>(0.7) | Pd(PPh <sub>3</sub> ) <sub>4</sub><br>3.5; 0.003;<br>0.15          | Na <sub>2</sub> CO <sub>3</sub><br>21.2; 0.2;<br>10 | 48                                        | reflux               | 4.1;<br>21.0                                        |
| 4     | 8.8;<br>0.02;<br>1.0                        | 21.6;<br>0.07;<br>3.5                       | PhMe<br>(2);<br>EtOH<br>(2)                                   | Pd(dppf)Cl <sub>2</sub><br>2.2; 0.003;<br>0.15                     | K <sub>2</sub> CO <sub>3</sub><br>33.2; 0.24;<br>12 | 24                                        | reflux               | 4.8;<br>24.0                                        |
| 5     | 8.8;<br>0.02;<br>1.0                        | 21.6;<br>0.07;<br>3.5                       | PhMe<br>(2);<br>EtOH<br>(2)                                   | XPhos Pd<br>G2<br>4.7; 0.005;<br>0.3<br>XPhos<br>5.7; 0.01;<br>0.6 | K <sub>2</sub> CO <sub>3</sub><br>33.2; 0.24;<br>12 | 24                                        | reflux               | 7.7;<br>39.0                                        |
| 6     | 8.8;<br>0.02;<br>1.0                        | 21.6;<br>0.07;<br>3.5                       | PhMe<br>(2.1);<br>H <sub>2</sub> O<br>(0.7);<br>EtOH<br>(0.7) | Pd(PPh <sub>3</sub> ) <sub>4</sub><br>6.9; 0.006;<br>0.3           | K <sub>2</sub> CO <sub>3</sub><br>33.2; 0.24;<br>12 | 24                                        | reflux               | 8.9;<br><b>50.0</b>                                 |

<sup>a</sup> Isolated yield.

**Table S2.** Optimization experiments for the synthesis of **D2**.

| Entry          | <b>4</b><br>(mg;<br>mmol;<br>equiv) | <b>2</b><br>(mg;<br>mmol;<br>equiv)                               | solvent<br>(ml)                                    | catalyst<br>(mg; mmol;<br>equiv)                                                         | base<br>(mg; mmol;<br>equiv)                                | Reaction<br>time<br>(hours) | temp.<br>(°C) | <b>D2</b><br>yield <sup>a</sup><br>(mg; %) |
|----------------|-------------------------------------|-------------------------------------------------------------------|----------------------------------------------------|------------------------------------------------------------------------------------------|-------------------------------------------------------------|-----------------------------|---------------|--------------------------------------------|
| 1              | 26.7;<br>0.06;<br><u>1.0</u>        | 57.0;<br>0.21;<br><u>3.5</u>                                      | PhMe<br>(6.5);<br>H <sub>2</sub> O (3);<br>THF (5) | Pd(PPh <sub>3</sub> ) <sub>4</sub><br>7.0; 0.006;<br><u>0.1</u>                          | K <sub>2</sub> CO <sub>3</sub><br>100.0; 0.72;<br><u>12</u> | 24                          | reflux        | 1.6; 3.0                                   |
| 2              | 26.7;<br>0.06;<br><u>1.0</u>        | 57.0;<br>0.21;<br><u>3.5</u>                                      | THF (5)                                            | Pd(PPh <sub>3</sub> ) <sub>4</sub><br>7.0; 0.006;<br><u>0.1</u>                          | K <sub>2</sub> CO <sub>3</sub><br>100.0; 0.72;<br><u>12</u> | 24                          | reflux        | 3.9; 7.0                                   |
| 3              | 26.7;<br>0.06;<br><u>1.0</u>        | 57.0;<br>0.21;<br><u>3.5</u>                                      | THF (6)                                            | Pd(PPh <sub>3</sub> ) <sub>4</sub><br>7.0; 0.006;<br><u>0.1</u>                          | K <sub>2</sub> CO <sub>3</sub><br>100.0; 0.72;<br><u>12</u> | 48                          | reflux.       | 3.4; 6.0                                   |
| 4              | 26.7;<br>0.06;<br><u>1.0</u>        | 96.4;<br>0.36;<br><u>6.0</u>                                      | THF (5)                                            | Pd(dppf)Cl <sub>2</sub><br>4.4; 0.006;<br><u>0.1</u>                                     | K <sub>2</sub> CO <sub>3</sub><br>100.0; 0.72;<br><u>12</u> | 24                          | reflux        | 4.6; 7.6                                   |
| 5 <sup>b</sup> | 26.7;<br>0.06;<br><u>1.0</u>        | 64.3;<br>0.24;<br><u>4.0</u><br>+<br>32.1;<br>0.12;<br><u>2.0</u> | THF (5)                                            | Pd(dppf)Cl <sub>2</sub><br>4.4; 0.006;<br><u>0.05</u><br>+<br>2.2; 0.003;<br><u>0.05</u> | K <sub>2</sub> CO <sub>3</sub><br>100.0; 0.72;<br><u>12</u> | 24                          | reflux        | 10.4;<br>40.0                              |
| 6              | 26.7;<br>0.06;<br><u>1.0</u>        | 96.4;<br>0.36;<br><u>6.0</u>                                      | DMF (6)                                            | Pd(dppf)Cl <sub>2</sub><br>4.4; 0.006;<br><u>0.1</u>                                     | K <sub>2</sub> CO <sub>3</sub><br>100.0; 0.72;<br><u>12</u> | 24                          | 80°C          | 24.4;<br><b>41.0</b>                       |

<sup>a</sup> Isolated yield; <sup>b</sup> In this trial, new portion of **4** and Pd catalyst were added after 6 hours.

**Chemical structure of D1:** c1ccc(cc1)-c2ccc(cc2)-c3cc(ccc3)-c4cc(ccc4)-c5cc(ccc5)-c6cc(ccc6)-c7cc(ccc7)-c8cc(ccc8)-c9cc(ccc9)-c10cc(ccc10)-c11cc(ccc11)-c12cc(ccc12)-c13cc(ccc13)-c14cc(ccc14)-c15cc(ccc15)-c16cc(ccc16)-c17cc(ccc17)-c18cc(ccc18)-c19cc(ccc19)-c20cc(ccc20)-c21cc(ccc21)-c22cc(ccc22)-c23cc(ccc23)-c24cc(ccc24)-c25cc(ccc25)-c26cc(ccc26)-c27cc(ccc27)-c28cc(ccc28)-c29cc(ccc29)-c30cc(ccc30)-c31cc(ccc31)-c32cc(ccc32)-c33cc(ccc33)-c34cc(ccc34)-c35cc(ccc35)-c36cc(ccc36)-c37cc(ccc37)-c38cc(ccc38)-c39cc(ccc39)-c40cc(ccc40)-c41cc(ccc41)-c42cc(ccc42)-c43cc(ccc43)-c44cc(ccc44)-c45cc(ccc45)-c46cc(ccc46)-c47cc(ccc47)-c48cc(ccc48)-c49cc(ccc49)-c50cc(ccc50)-c51cc(ccc51)-c52cc(ccc52)-c53cc(ccc53)-c54cc(ccc54)-c55cc(ccc55)-c56cc(ccc56)-c57cc(ccc57)-c58cc(ccc58)-c59cc(ccc59)-c60cc(ccc60)-c61cc(ccc61)-c62cc(ccc62)-c63cc(ccc63)-c64cc(ccc64)-c65cc(ccc65)-c66cc(ccc66)-c67cc(ccc67)-c68cc(ccc68)-c69cc(ccc69)-c70cc(ccc70)-c71cc(ccc71)-c72cc(ccc72)-c73cc(ccc73)-c74cc(ccc74)-c75cc(ccc75)-c76cc(ccc76)-c77cc(ccc77)-c78cc(ccc78)-c79cc(ccc79)-c80cc(ccc80)-c81cc(ccc81)-c82cc(ccc82)-c83cc(ccc83)-c84cc(ccc84)-c85cc(ccc85)-c86cc(ccc86)-c87cc(ccc87)-c88cc(ccc88)-c89cc(ccc89)-c90cc(ccc90)-c91cc(ccc91)-c92cc(ccc92)-c93cc(ccc93)-c94cc(ccc94)-c95cc(ccc95)-c96cc(ccc96)-c97cc(ccc97)-c98cc(ccc98)-c99cc(ccc99)-c100cc(ccc100)-c101cc(ccc101)-c102cc(ccc102)-c103cc(ccc103)-c104cc(ccc104)-c105cc(ccc105)-c106cc(ccc106)-c107cc(ccc107)-c108cc(ccc108)-c109cc(ccc109)-c110cc(ccc110)-c111cc(ccc111)-c112cc(ccc112)-c113cc(ccc113)-c114cc(ccc114)-c115cc(ccc115)-c116cc(ccc116)-c117cc(ccc117)-c118cc(ccc118)-c119cc(ccc119)-c120cc(ccc120)-c121cc(ccc121)-c122cc(ccc122)-c123cc(ccc123)-c124cc(ccc124)-c125cc(ccc125)-c126cc(ccc126)-c127cc(ccc127)-c128cc(ccc128)-c129cc(ccc129)-c130cc(ccc130)-c131cc(ccc131)-c132cc(ccc132)-c133cc(ccc133)-c134cc(ccc134)-c135cc(ccc135)-c136cc(ccc136)-c137cc(ccc137)-c138cc(ccc138)-c139cc(ccc139)-c140cc(ccc140)-c141cc(ccc141)-c142cc(ccc142)-c143cc(ccc143)-c144cc(ccc144)-c145cc(ccc145)-c146cc(ccc146)-c147cc(ccc147)-c148cc(ccc148)-c149cc(ccc149)-c150cc(ccc150)-c151cc(ccc151)-c152cc(ccc152)-c153cc(ccc153)-c154cc(ccc154)-c155cc(ccc155)-c156cc(ccc156)-c157cc(ccc157)-c158cc(ccc158)-c159cc(ccc159)-c160cc(ccc160)-c161cc(ccc161)-c162cc(ccc162)-c163cc(ccc163)-c164cc(ccc164)-c165cc(ccc165)-c166cc(ccc166)-c167cc(ccc167)-c168cc(ccc168)-c169cc(ccc169)-c170cc(ccc170)-c171cc(ccc171)-c172cc(ccc172)-c173cc(ccc173)-c174cc(ccc174)-c175cc(ccc175)-c176cc(ccc176)-c177cc(ccc177)-c178cc(ccc178)-c179cc(ccc179)-c180cc(ccc180)-c181cc(ccc181)-c182cc(ccc182)-c183cc(ccc183)-c184cc(ccc184)-c185cc(ccc185)-c186cc(ccc186)-c187cc(ccc187)-c188cc(ccc188)-c189cc(ccc189)-c190cc(ccc190)-c191cc(ccc191)-c192cc(ccc192)-c193cc(ccc193)-c194cc(ccc194)-c195cc(ccc195)-c196cc(ccc196)-c197cc(ccc197)-c198cc(ccc198)-c199cc(ccc199)-c200cc(ccc200)-c201cc(ccc201)-c202cc(ccc202)-c203cc(ccc203)-c204cc(ccc204)-c205cc(ccc205)-c206cc(ccc206)-c207cc(ccc207)-c208cc(ccc208)-c209cc(ccc209)-c210cc(ccc210)-c211cc(ccc211)-c212cc(ccc212)-c213cc(ccc213)-c214cc(ccc214)-c215cc(ccc215)-c216cc(ccc216)-c217cc(ccc217)-c218cc(ccc218)-c219cc(ccc219)-c220cc(ccc220)-c221cc(ccc221)-c222cc(ccc222)-c223cc(ccc223)-c224cc(ccc224)-c225cc(ccc225)-c226cc(ccc226)-c227cc(ccc227)-c228cc(ccc228)-c229cc(ccc229)-c230cc(ccc230)-c231cc(ccc231)-c232cc(ccc232)-c233cc(ccc233)-c234cc(ccc234)-c235cc(ccc235)-c236cc(ccc236)-c237cc(ccc237)-c238cc(ccc238)-c239cc(ccc239)-c240cc(ccc240)-c241cc(ccc241)-c242cc(ccc242)-c243cc(ccc243)-c244cc(ccc244)-c245cc(ccc245)-c246cc(ccc246)-c247cc(ccc247)-c248cc(ccc248)-c249cc(ccc249)-c250cc(ccc250)-c251cc(ccc251)-c252cc(ccc252)-c253cc(ccc253)-c254cc(ccc254)-c255cc(ccc255)-c256cc(ccc256)-c257cc(ccc257)-c258cc(ccc258)-c259cc(ccc259)-c260cc(ccc260)-c261cc(ccc261)-c262cc(ccc262)-c263cc(ccc263)-c264cc(ccc264)-c265cc(ccc265)-c266cc(ccc266)-c267cc(ccc267)-c268cc(ccc268)-c269cc(ccc269)-c270cc(ccc270)-c271cc(ccc271)-c272cc(ccc272)-c273cc(ccc273)-c274cc(ccc274)-c275cc(ccc275)-c276cc(ccc276)-c277cc(ccc277)-c278cc(ccc278)-c279cc(ccc279)-c280cc(ccc280)-c281cc(ccc281)-c282cc(ccc282)-c283cc(ccc283)-c284cc(ccc284)-c285cc(ccc285)-c286cc(ccc286)-c287cc(ccc287)-c288cc(ccc288)-c289cc(ccc289)-c290cc(ccc290)-c291cc(ccc291)-c292cc(ccc292)-c293cc(ccc293)-c294cc(ccc294)-c295cc(ccc295)-c296cc(ccc296)-c297cc(ccc297)-c298cc(ccc298)-c299cc(ccc299)-c300cc(ccc300)-c301cc(ccc301)-c302cc(ccc302)-c303cc(ccc303)-c304cc(ccc304)-c305cc(ccc305)-c306cc(ccc306)-c307cc(ccc307)-c308cc(ccc308)-c309cc(ccc309)-c310cc(ccc310)-c311cc(ccc311)-c312cc(ccc312)-c313cc(ccc313)-c314cc(ccc314)-c315cc(ccc315)-c316cc(ccc316)-c317cc(ccc317)-c318cc(ccc318)-c319cc(ccc319)-c320cc(ccc320)-c321cc(ccc321)-c322cc(ccc322)-c323cc(ccc323)-c324cc(ccc324)-c325cc(ccc325)-c326cc(ccc326)-c327cc(ccc327)-c328cc(ccc328)-c329cc(ccc329)-c330cc(ccc330)-c331cc(ccc331)-c332cc(ccc332)-c333cc(ccc333)-c334cc(ccc334)-c335cc(ccc335)-c336cc(ccc336)-c337cc(ccc337)-c338cc(ccc338)-c339cc(ccc339)-c340cc(ccc340)-c341cc(ccc341)-c342cc(ccc342)-c343cc(ccc343)-c344cc(ccc344)-c345cc(ccc345)-c346cc(ccc346)-c347cc(ccc347)-c348cc(ccc348)-c349cc(ccc349)-c350cc(ccc350)-c351cc(ccc351)-c352cc(ccc352)-c353cc(ccc353)-c354cc(ccc354)-c355cc(ccc355)-c356cc(ccc356)-c357cc(ccc357)-c358cc(ccc358)-c359cc(ccc359)-c360cc(ccc360)-c361cc(ccc361)-c362cc(ccc362)-c363cc(ccc363)-c364cc(ccc364)-c365cc(ccc365)-c366cc(ccc366)-c367cc(ccc367)-c368cc(ccc368)-c369cc(ccc369)-c370cc(ccc370)-c371cc(ccc371)-c372cc(ccc372)-c373cc(ccc373)-c374cc(ccc374)-c375cc(ccc375)-c376cc(ccc376)-c377cc(ccc377)-c378cc(ccc378)-c379cc(ccc379)-c380cc(ccc380)-c381cc(ccc381)-c382cc(ccc382)-c383cc(ccc383)-c384cc(ccc384)-c385cc(ccc385)-c386cc(ccc3

S5

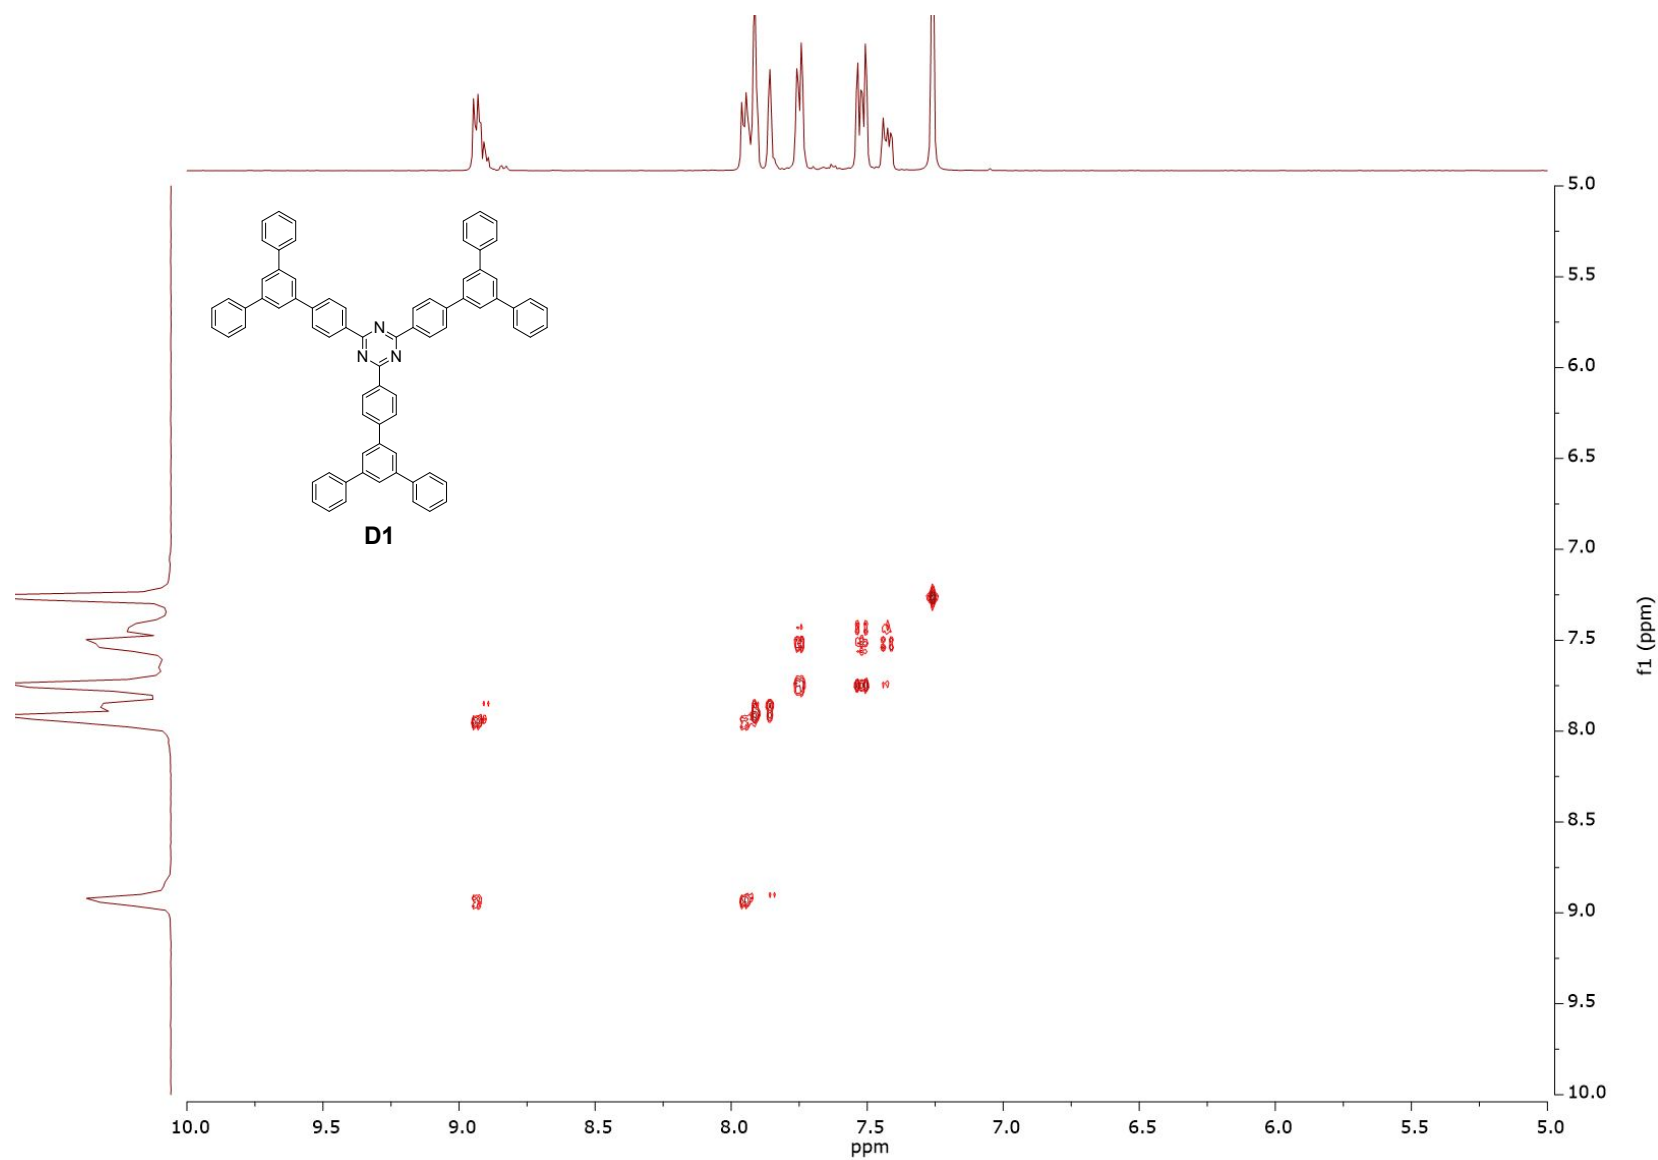

**Figure S2.**  $^1\text{H}$ - $^1\text{H}$  COSY NMR spectrum (500 MHz,  $\text{CDCl}_3$ ) of **D1**.



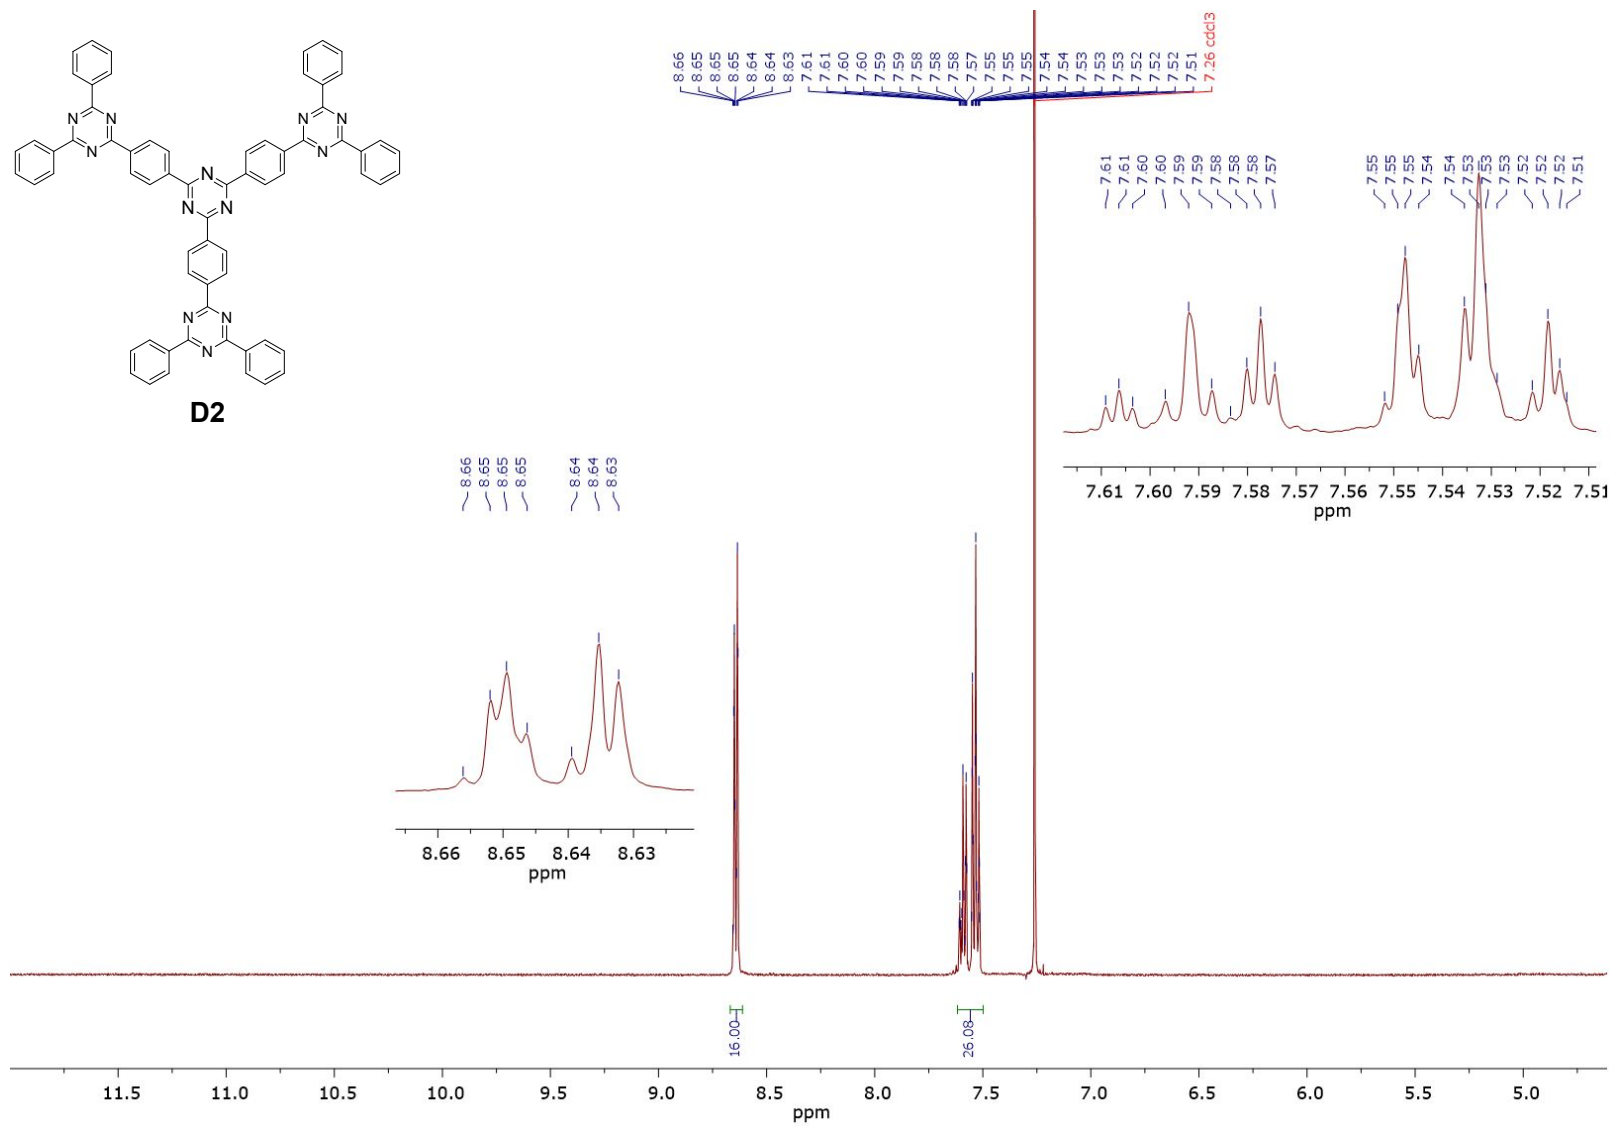

**Figure S4.**  $^1\text{H}$  NMR spectrum (500 MHz,  $\text{CDCl}_3$ ) of **D2**.





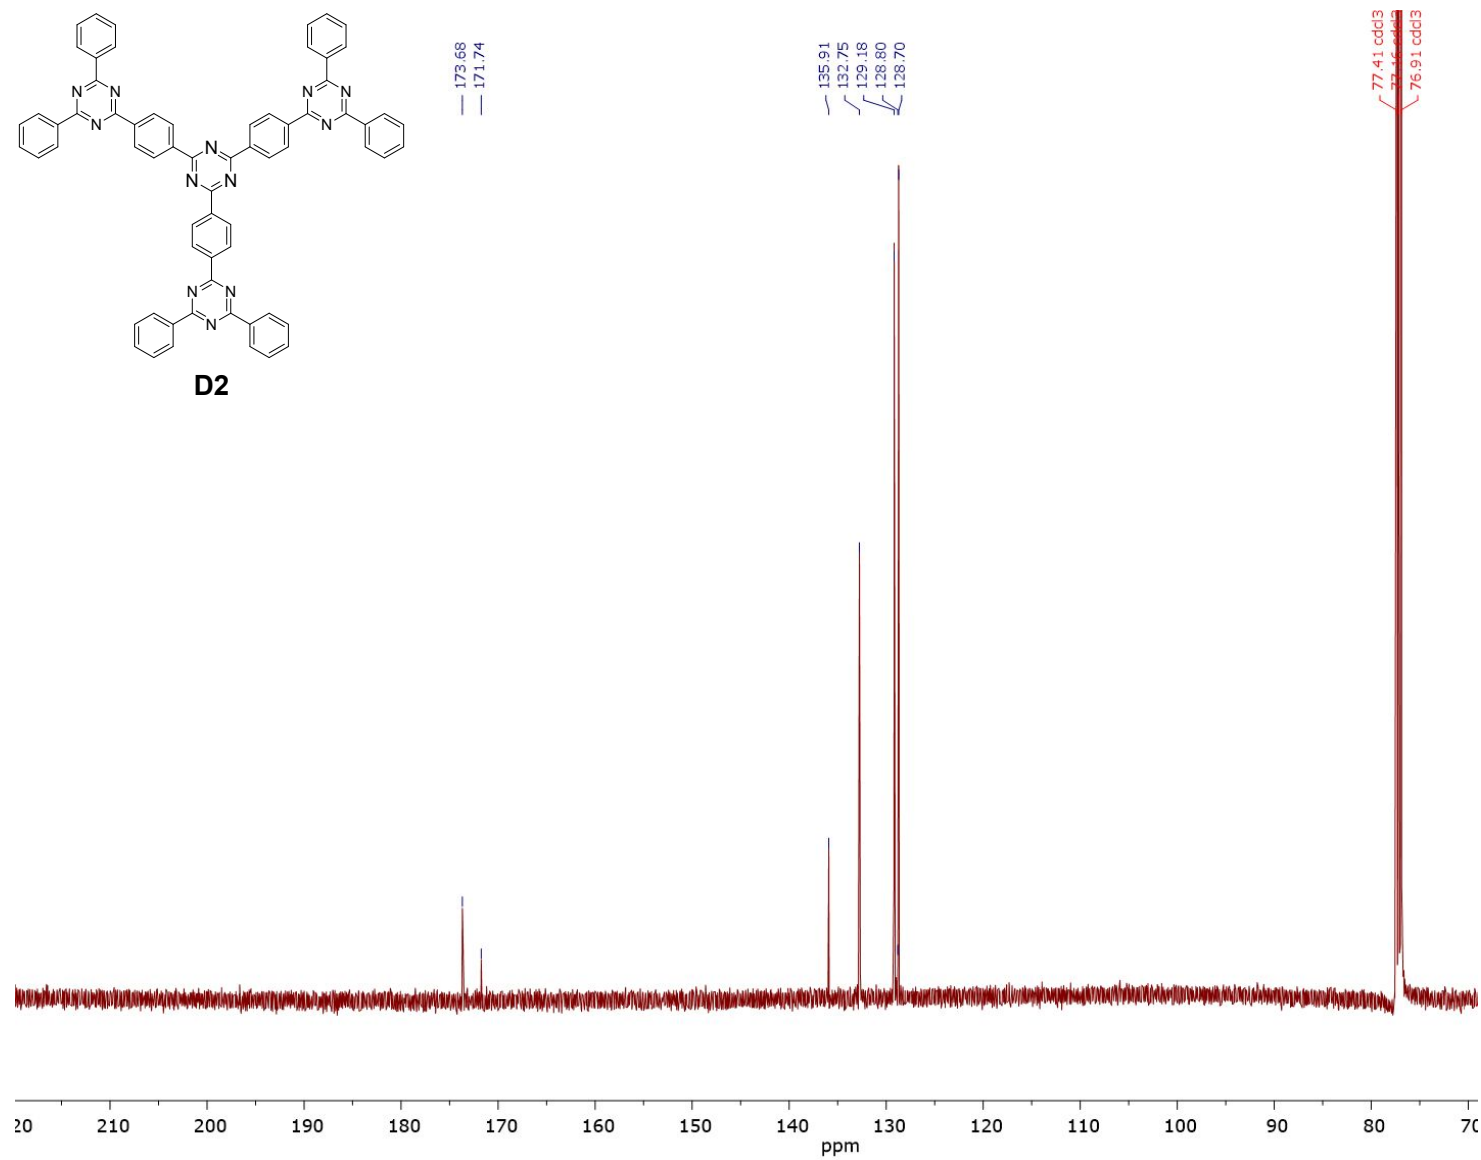

**Figure S6.**  $^{13}\text{C}\{^1\text{H}\}$  NMR spectrum (125 MHz,  $\text{CDCl}_3$ ) of **D2**.

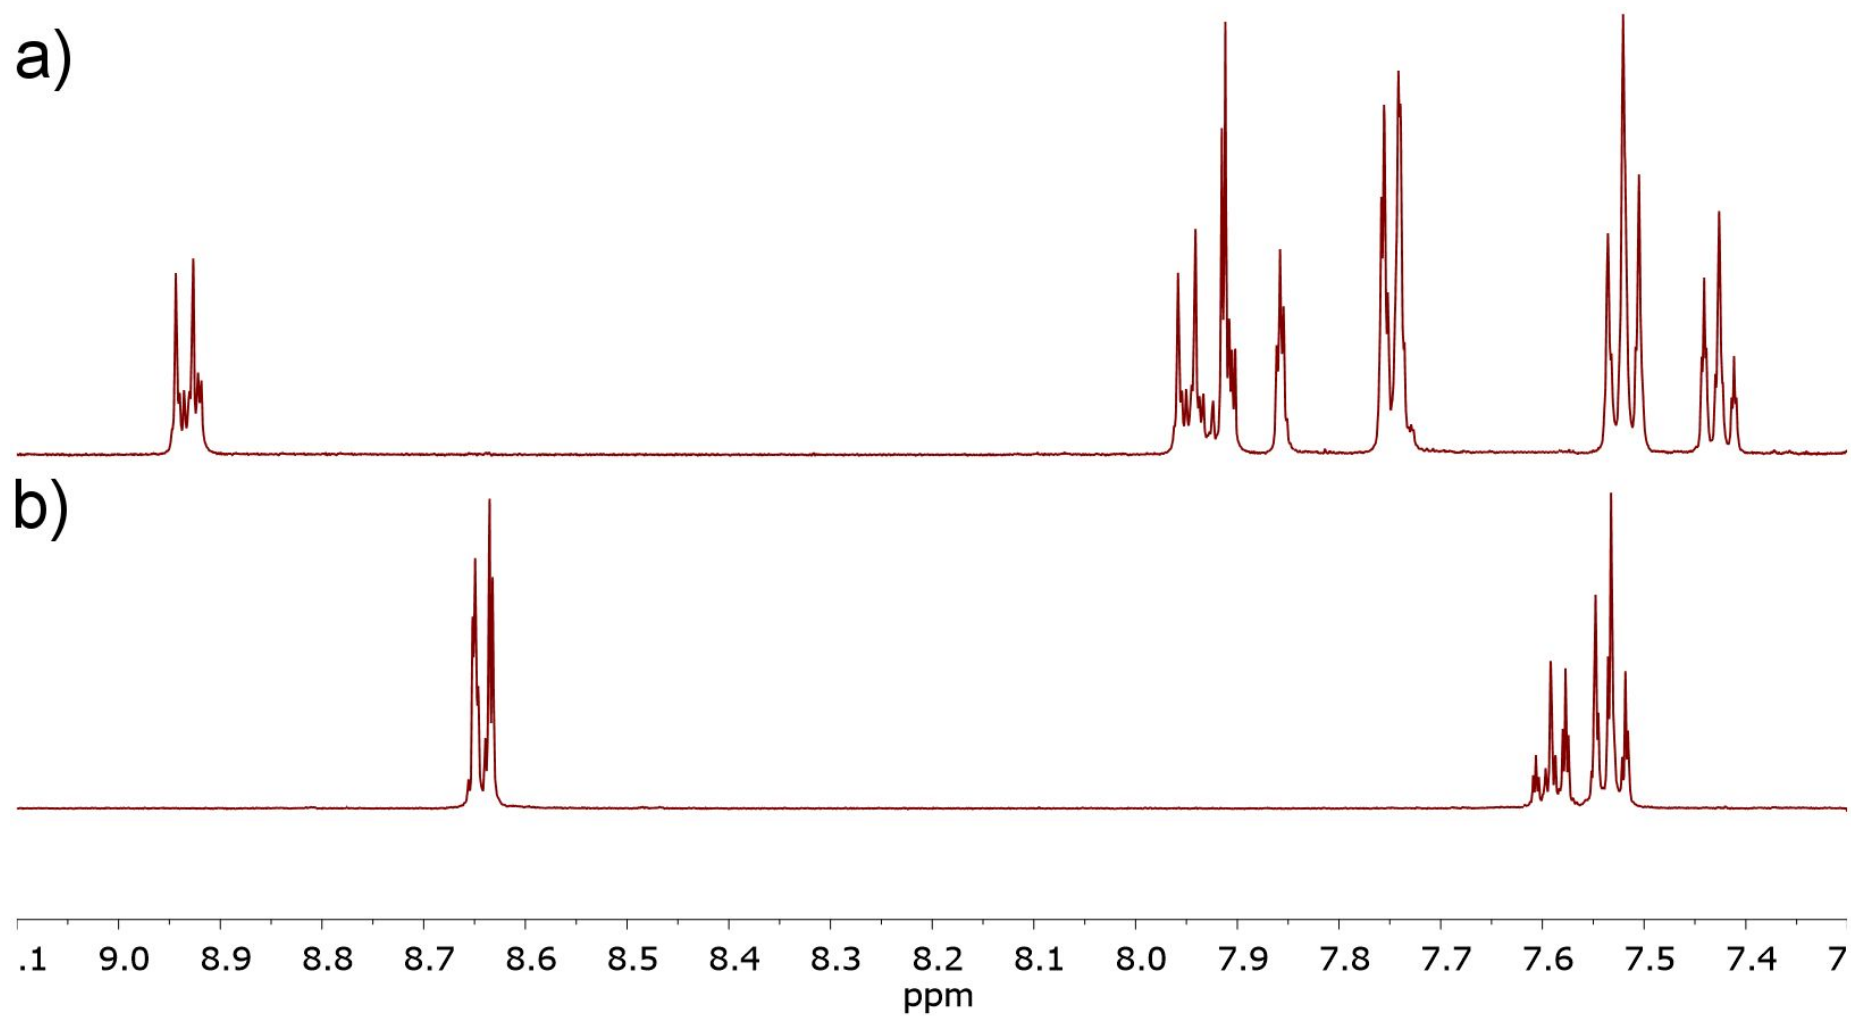

**Figure S7.** Comparison of <sup>1</sup>H NMR spectra (500 MHz, CDCl<sub>3</sub>) of **D1** (a) and **D2** (b). 9.10-7.30 ppm insets are presented.

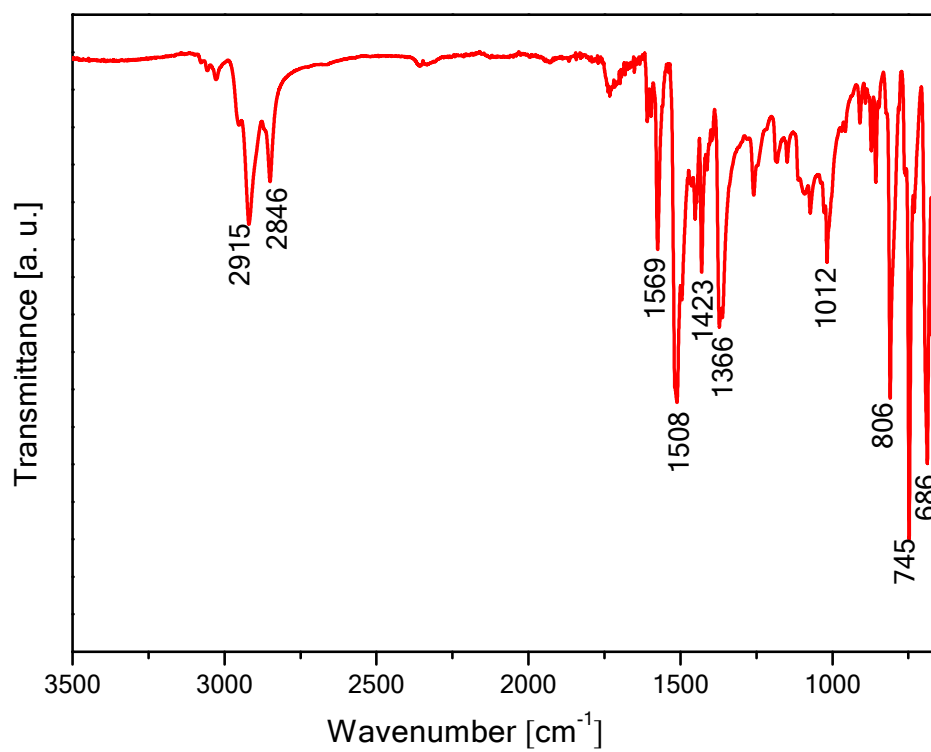

**Figure S8.** FT-IR spectrum of **D1**.

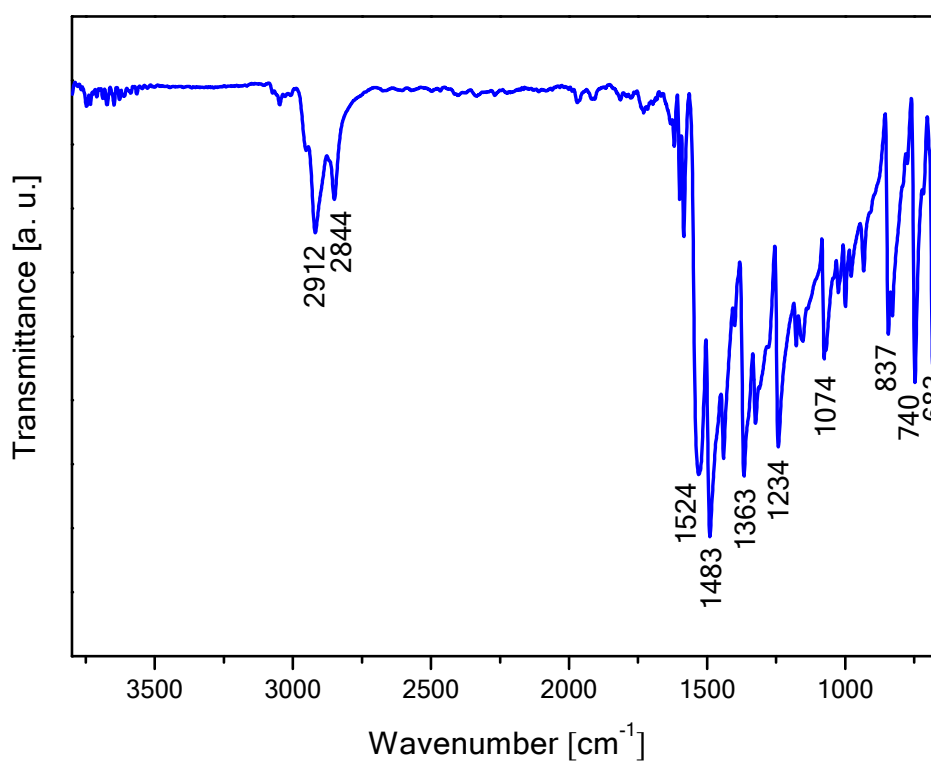

**Figure S9.** FT-IR spectrum of **D2**.

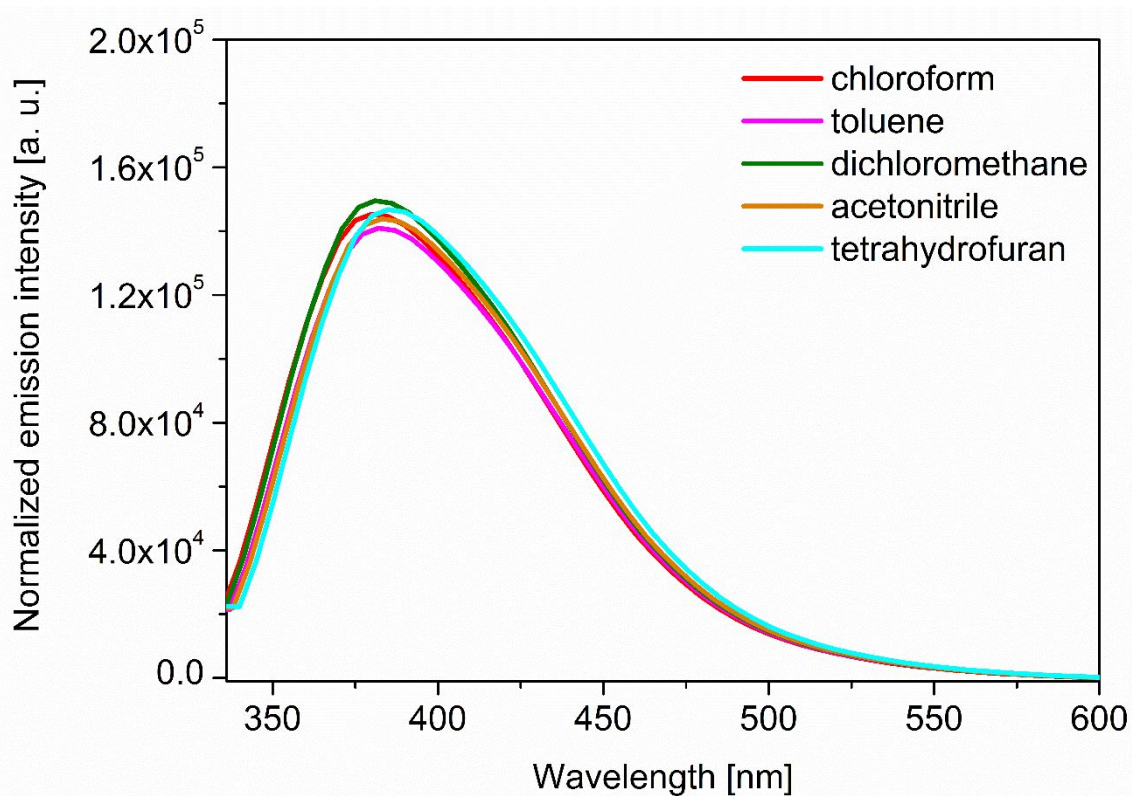

**Figure S10.** Emission spectra for **D1** measured in different solvents. Concentrations of the samples:  $2 \cdot 10^{-5}$  M.  $\lambda_{\text{ex}} = 315$  nm.

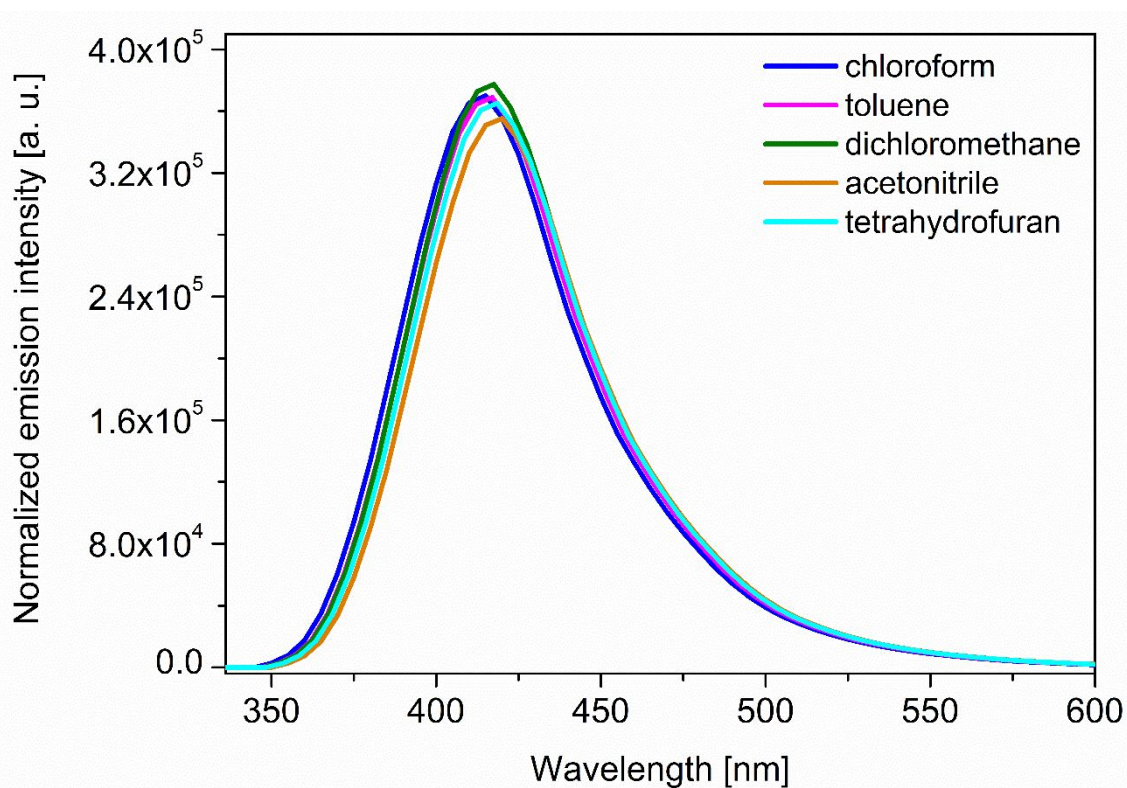

**Figure S11.** Emission spectra for **D2** measured in different solvents. Concentrations of the samples:  $2 \cdot 10^{-5}$  M.  $\lambda_{\text{ex}} = 315$  nm.

### S3. Photocatalytic studies

#### S3.1 Photocatalytic synthesis of *N*-benzylidene benzylamines from benzylamines

**Table S3.** The results of the optimization experiments toward photocatalytic oxidation of benzylamine (**5**) using **D1** or **D2** as the photocatalyst.

| 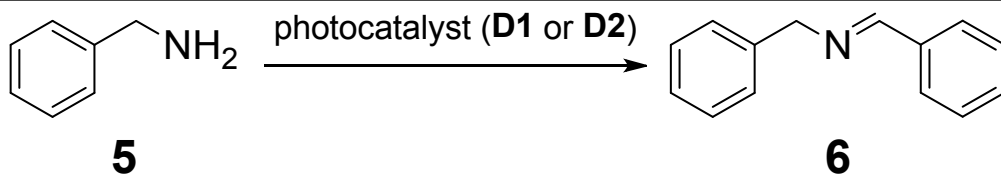 |                                      |                              |                             |  |
|------------------------------------------------------------------------------------|--------------------------------------|------------------------------|-----------------------------|--|
| Entry                                                                              | Photocatalyst <sup>a</sup><br>(mol%) | (type; Reaction time (hours) | Conversion <sup>b</sup> (%) |  |
| 1                                                                                  | <b>D1</b> ; 0.5                      | 1.5                          | 52                          |  |
| 2                                                                                  | <b>D2</b> ; 0.5                      | 1.5                          | 78                          |  |
| 3                                                                                  | <b>D2</b> ; 0.5                      | 2.0                          | 83                          |  |
| 4                                                                                  | <b>D2</b> ; 1.0                      | 3.0                          | 87                          |  |
| 5                                                                                  | <b>D2</b> ; 1.5                      | 3.0                          | 94                          |  |
| 6                                                                                  | <b>D2</b> ; 2.0                      | 3.0                          | >99 <sup>c</sup>            |  |
| 7                                                                                  | -                                    | 3.0                          | 0                           |  |
| 8 <sup>d</sup>                                                                     | <b>D2</b> ; 2.0                      | 3.0                          | 0                           |  |
| 9 <sup>e</sup>                                                                     | <b>D2</b> ; 2.0                      | 3.0                          | 47                          |  |
| 10 <sup>f</sup>                                                                    | <b>D2</b> ; 2.0                      | 3.0                          | 34                          |  |
| 11 <sup>g</sup>                                                                    | <b>D2</b> ; 2.0                      | 3.0                          | 20                          |  |

<sup>a</sup> Reaction conditions: benzylamine (0.5 mmol), CH<sub>2</sub>Cl<sub>2</sub> (5 mL), room temperature, air, UV-LED irradiation (365 nm). <sup>b</sup> Estimated with <sup>1</sup>H NMR. <sup>c</sup> Quantitative isolated yield (also in the reaction scale of 1.5 mmol). <sup>d</sup> Reaction without using UV-LED irradiation. <sup>e</sup> Reaction in the presence of benzoquinone (2.0 mol%). <sup>f</sup> Reaction in the presence of DMPO (2.0 mol%). <sup>g</sup> Reaction in the presence of DABCO (2.0 mol%).

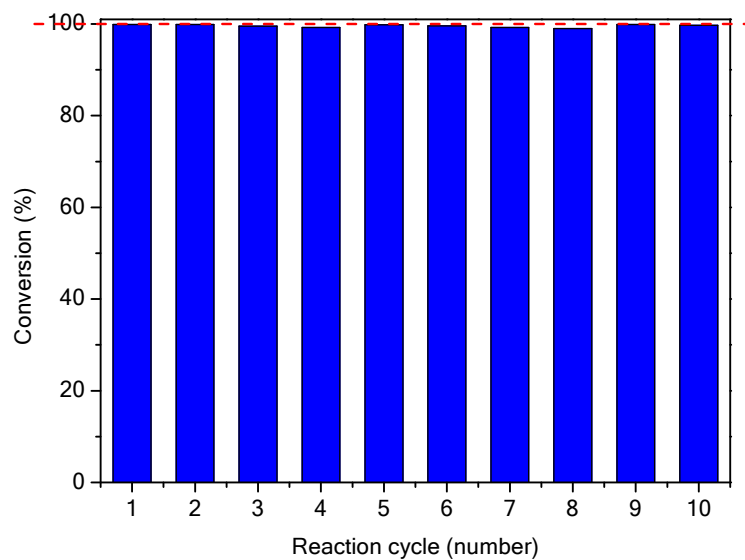

**Figure S12.** Data on the reusability studies with **D2** toward the synthesis of *N*-benzylidene benzylamine (**6**).

### S3.2 Determination of conversion of benzylamine based on $^1\text{H}$ NMR spectra

The calculations were based on the literature<sup>[2]</sup> following reaction equation:

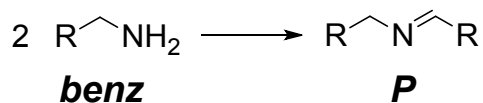

Conversion ( $C$ ) is defined as ratio of moles of benzylamine ( $\text{benz}$ ) reacted ( $n_{\text{benz}}^R$ ) to the initial number of moles of benzylamine ( $n_{\text{benz}}^0$ ), i.e.,  $C = \frac{n_{\text{benz}}^R}{n_{\text{benz}}^0}$ . Two moles of benzylamine ( $\text{benz}$ ) react to provide one mole of product ( $P$ ;  $N$ -benzylidene benzylamine), i.e.,  $n_{\text{benz}}^R = 2n_P$  and  $n_{\text{benz}}^0 = 2n_P + n_{\text{benz}}$ .

Considering the above equations,  $C$  was estimated as follows:

$$C = \frac{2n_P}{2n_P + n_{\text{benz}}} = \frac{2}{2 + \frac{n_{\text{benz}}}{n_P}}$$

Number of moles of  $\text{benz}$  ( $n_{\text{benz}}$ ) and  $P$  ( $n_P$ ) were calculated as follows:

$$n_{\text{benz}} = \frac{\text{integral of benz}}{N_{\text{benz}}} \text{ and } n_P = \frac{\text{integral of } P}{N_P}$$

where  $N_{\text{benz}}$  and  $N_P$  stand for the number of protons represented by the given peak.



**S3.3  $^1\text{H}$  NMR spectrum of the isolated *N*-benzylidene benzylamine (**6**) under optimized conditions**

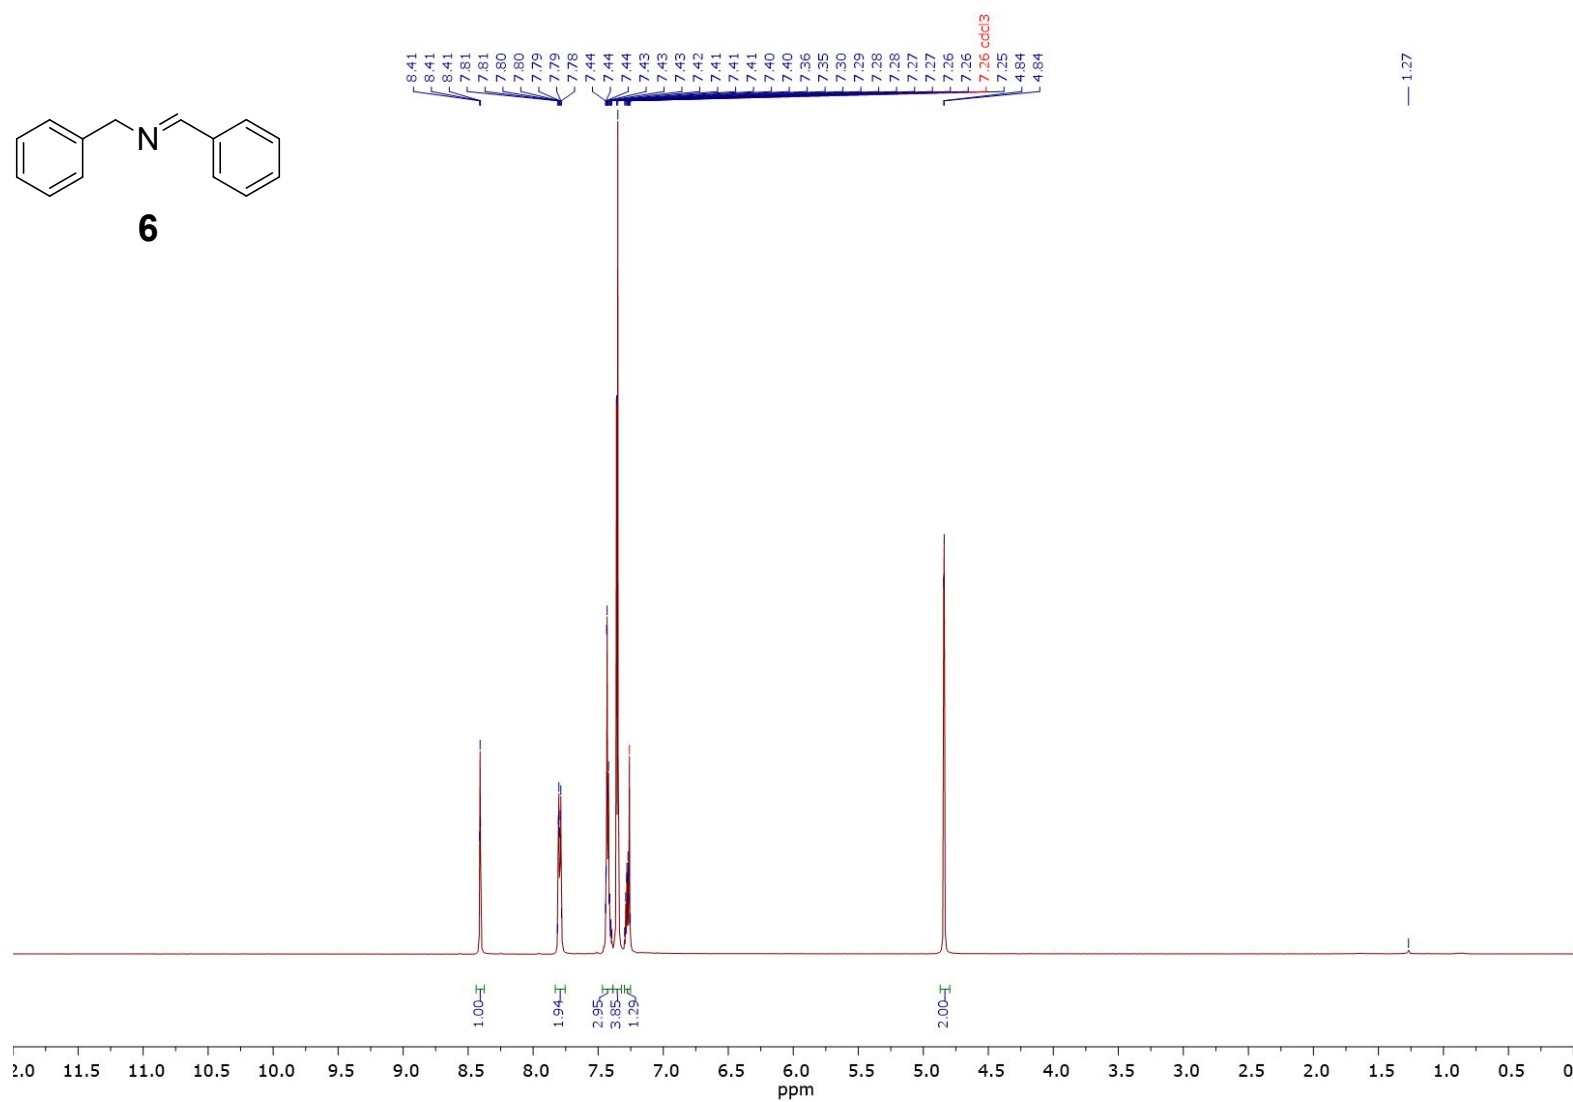

**Figure S13.**  $^1\text{H}$  NMR spectrum (500 MHz,  $\text{CDCl}_3$ ) of isolated *N*-benzylidene benzylamine (**6**) from the photocatalytic reaction.

### S34.4 Determination of HOMO-LUMO band gaps for D1 and D2

Tauc plot toward HOMO-LUMO band gap energy determination<sup>[3]</sup> for **D1** and **D2** are presented in Figure S14 and Figure S15.

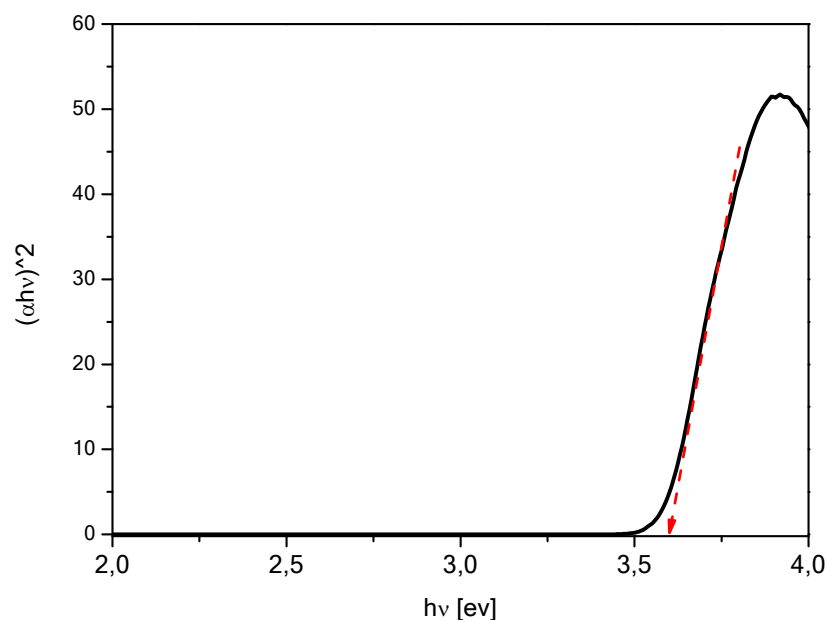

**Figure S14.** Tauc plot for **D1**. The linear part of the plot is extrapolated to the x-axis.

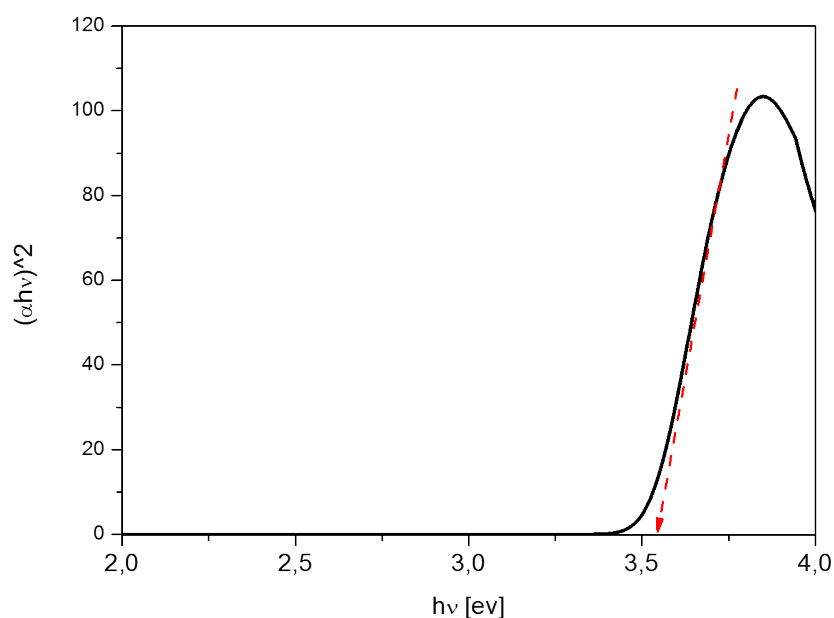

**Figure S15.** Tauc plot for **D2**. The linear part of the plot is extrapolated to the x-axis.

### S3.5 Plausible literature reaction mechanism

The plausible reaction mechanism of the studied photocatalytic reaction<sup>[1]</sup> is presented in Figure S16.

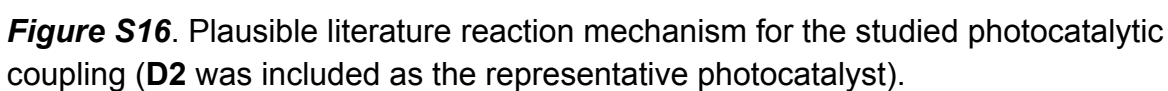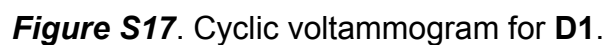

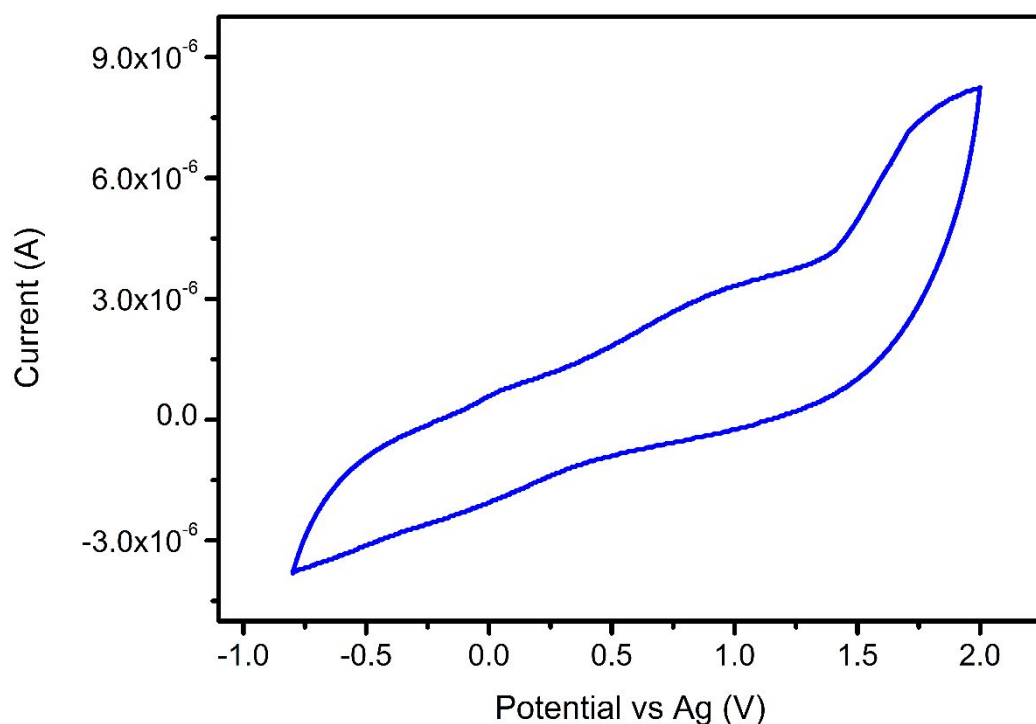

**Figure S18.** Cyclic voltammogram for **D2**.

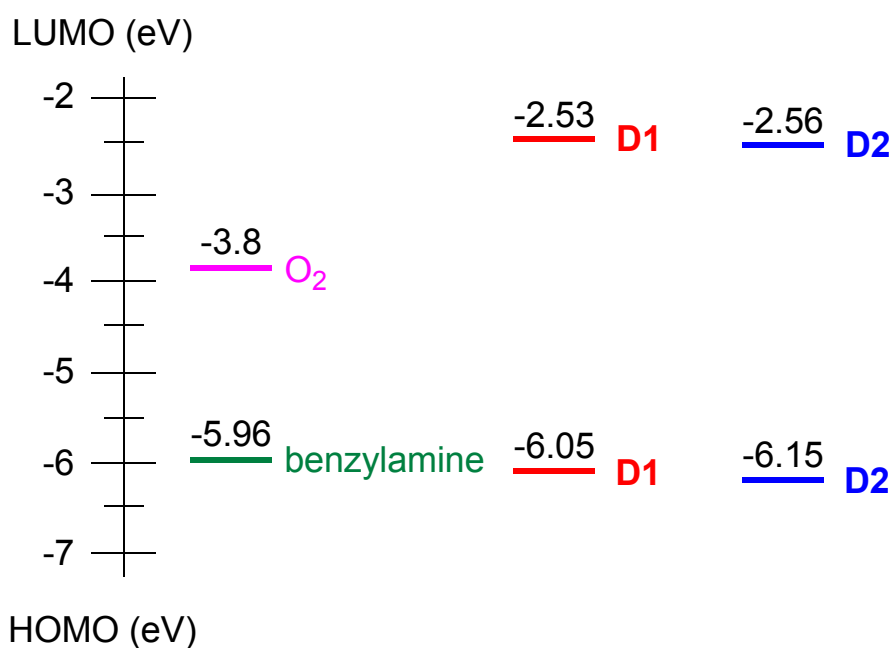

**Figure S19.** Schematic representation of the HOMO/LUMO energy levels of **D1** and **D2**. HOMO (eV) and LUMO (eV) values for **D1** and **D2** were calculated as follows<sup>[2]</sup> :  $\text{HOMO} = -[E_{\text{ox}}^{\text{onset}} + 4.8] \text{ eV}$ , where  $E_{\text{ox}}^{\text{onset}}$  was calculated from the cyclic voltammetry measurements,  $\text{LUMO} = -[\text{HOMO} + E_{\text{eg}}^{\text{opt}}]$ , where  $E_{\text{eg}}^{\text{opt}}$  was calculated the absorption onset. Please note that these band gaps and the respective values calculated from the Tauc plot method (Figures S14, S15) were highly consistent.

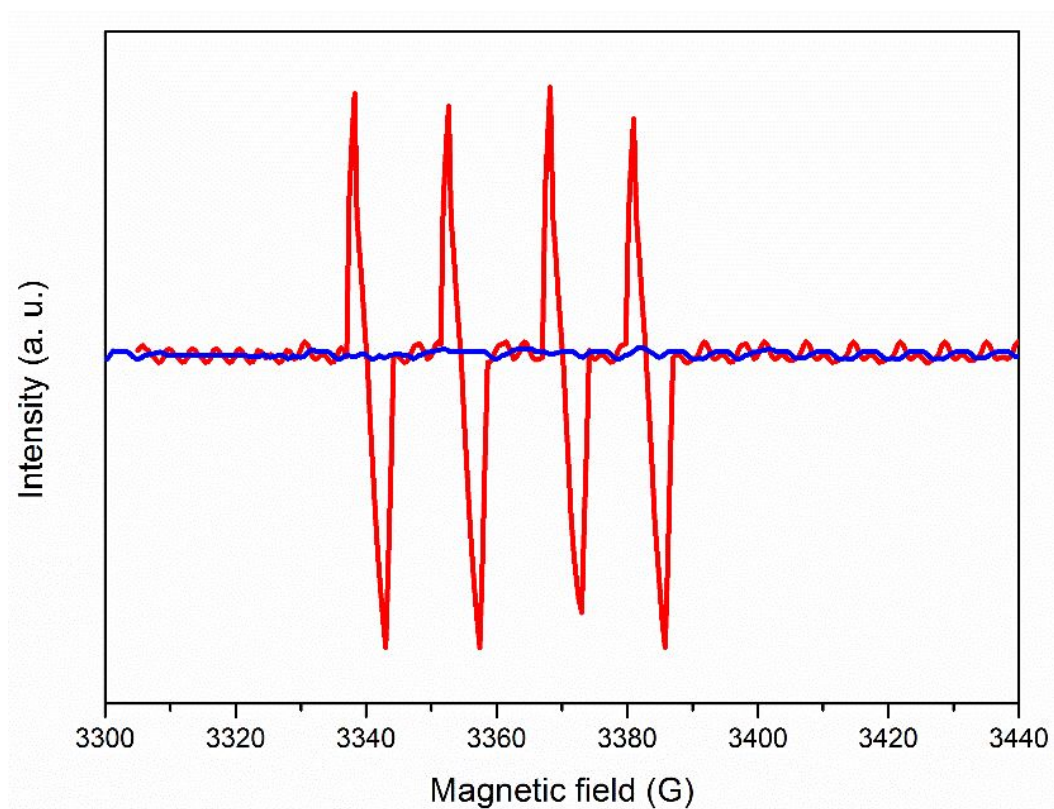

**Figure S20.** EPR spectra of DMPO- $\text{O}_2^{\bullet-}$ . The spectrum was measured at room temperature with irradiation (red line) or without irradiation (blue line).

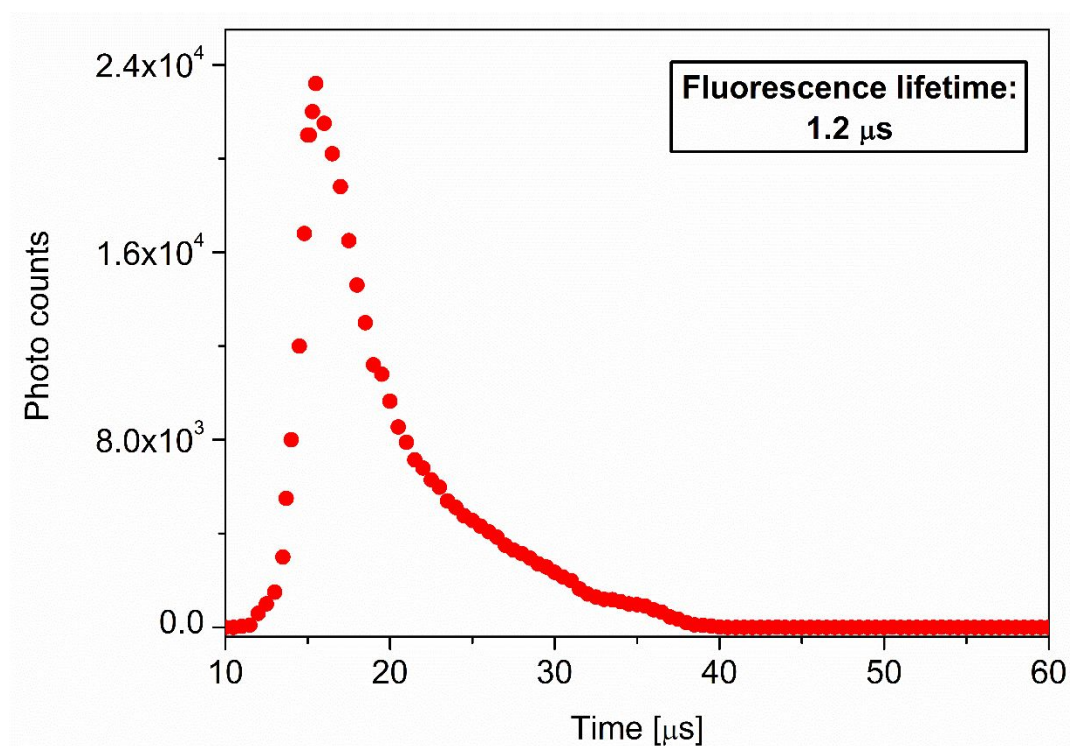

**Figure S21.** Fluorescence lifetime curve for **D1**. The fluorescence lifetime parameter is presented in the figure.

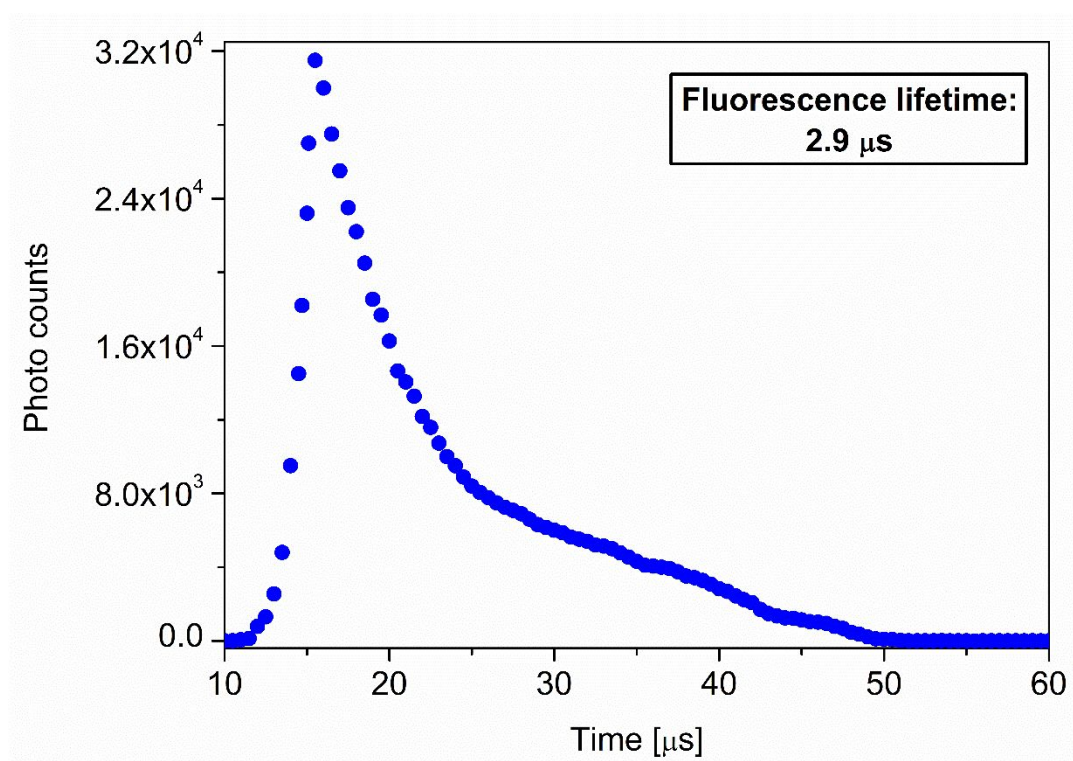

**Figure S22.** Fluorescence lifetime curve for **D2**. The fluorescence lifetime parameter is presented in the figure.



#### S4. TGA curves for D1 and D2

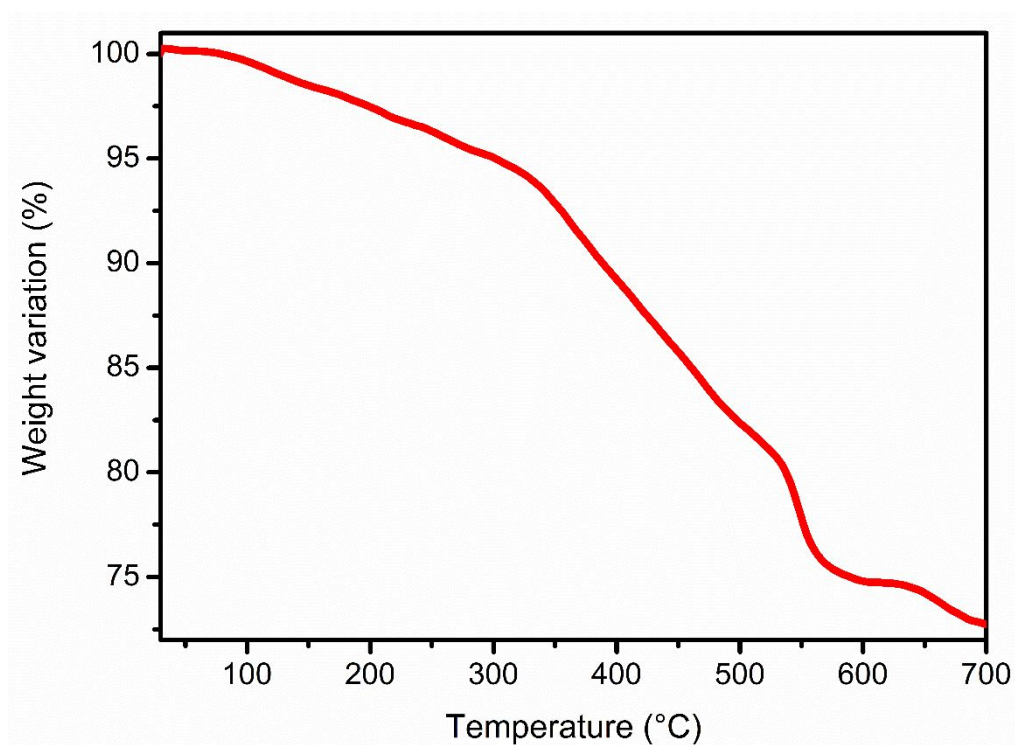

**Figure S23.** TGA curve (in argon) for **D1**.

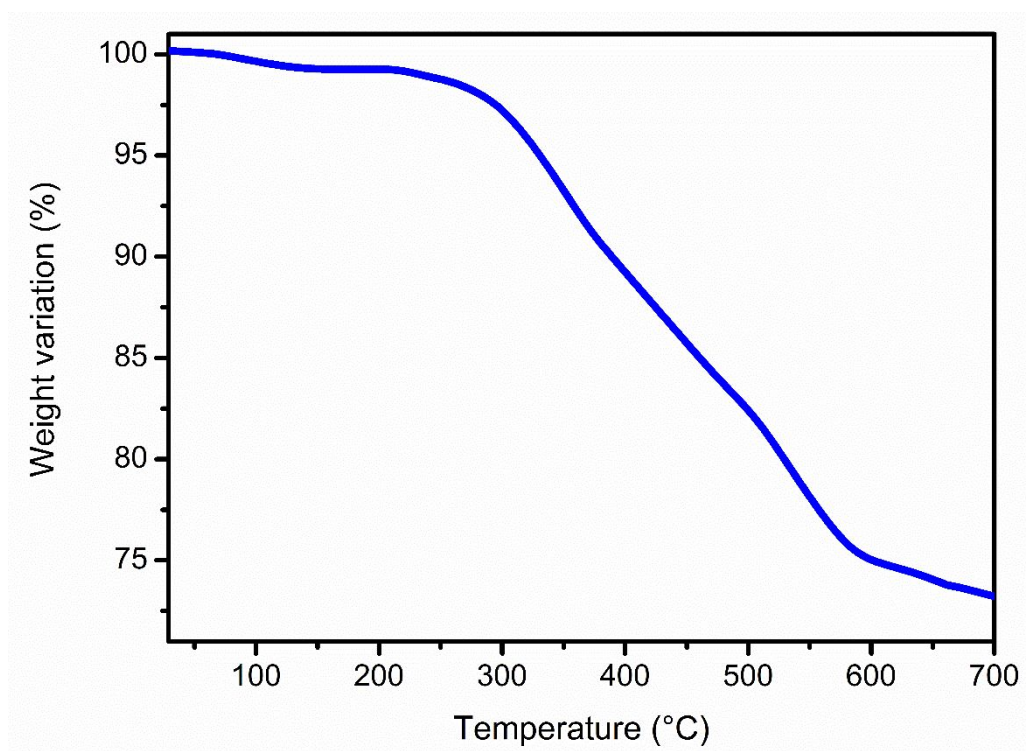

**Figure S24.** TGA curve (in argon) for **D2**.

## S5. UV-Vis spectra

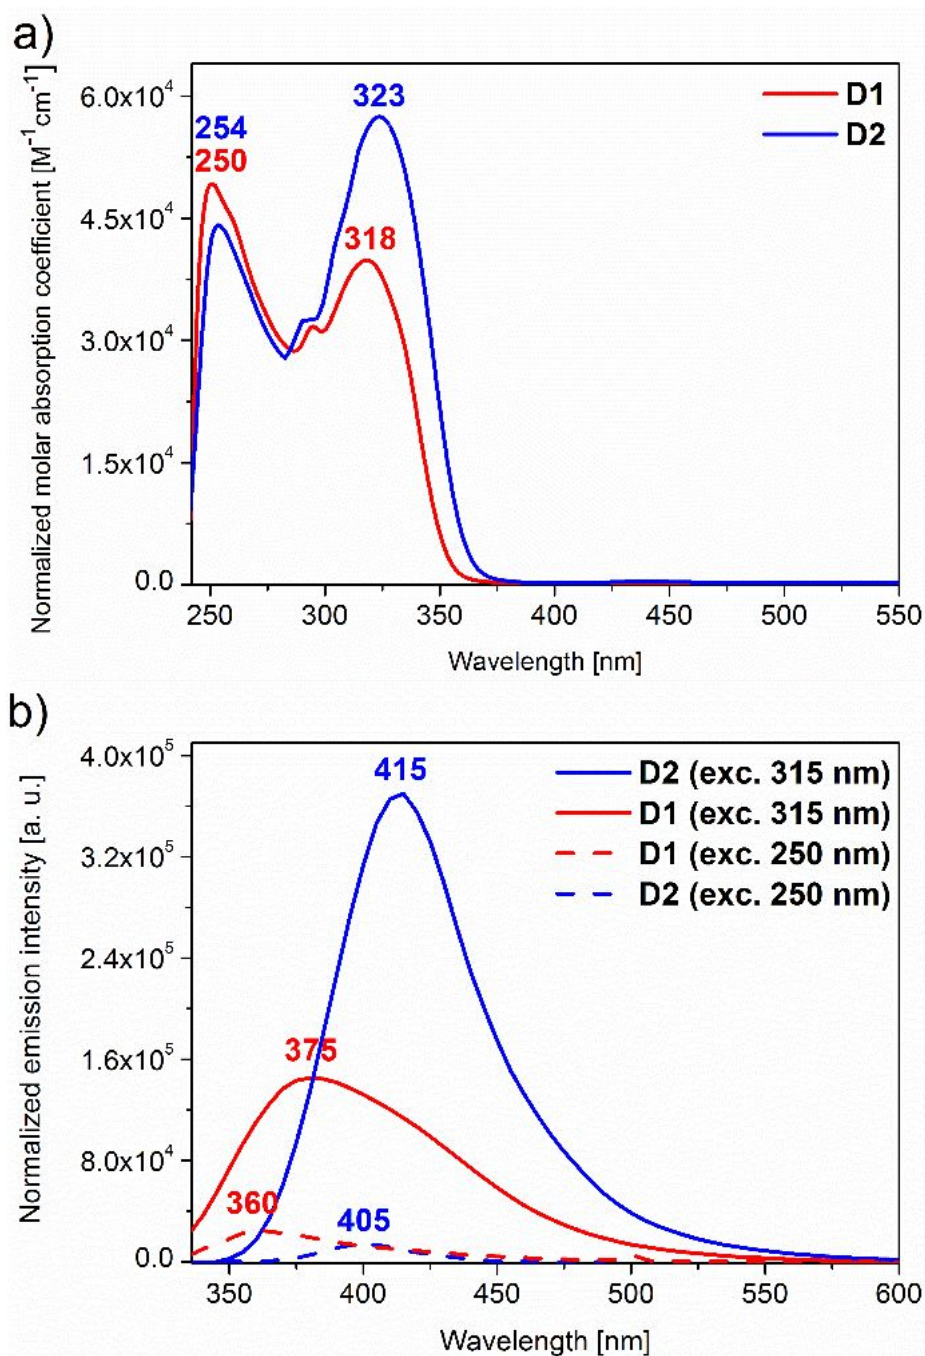

**Figure S25.** (a) UV-Vis and (b) emission spectra for **D1** and **D2**. Concentrations of the samples:  $2 \cdot 10^{-5}$  M ( $\text{CHCl}_3$ ).



## S6. OLED application trials with D1 and D2

The construction of the devices was based on the previously reported protocol<sup>[4]</sup> with slight modifications. Clean indium tin oxide (ITO) was dried in 130°C for 20 min and then treated with UV-Ozone for 7 minutes. Then, a layer of poly(3,4-ethylenedioxythiophene):poly(styrenesulfonate) (PEDOT:PSS) was prepared by spin coating onto the ITO at 700 rpm for 10 seconds and 3500 rpm for 90 seconds. It was then heated at 130°C for 40 minutes. In the meantime, an excess of a CHCl<sub>3</sub> solution of **D1** or **D2** (7 mg·mL<sup>-1</sup>) was added to the stock solution of 9,9'-(1,3-phenylene)-bis-9H-carbazole (MCP) in CHCl<sub>3</sub> to the final concentration of 25 wt%. This solution was spincoated on the ITO/PEDOT:PSS later and the as-obtained samples were placed into a deposition chamber. Tri[(3-pyridyl)-phen-3-yl]benzene (TmPyPb), LiF and Al were deposited thermally (2·10<sup>-5</sup> mbar). The emission area of the devices equaled to 0.15-0.16 cm<sup>2</sup>. OLED device comprising **D1** was labeled as 'OLED-D1', whilst the respective device consisting of **D2** was labelled as 'OLED-D2'. It was found that OLED-D1 emission maximum was placed at 380 nm, whilst for OLED-D2 this value equaled to 410 nm.

Luminescence-voltage (L-V) and current density-voltage (J-V) curves for device OLED-D1 and OLED-D2 are presented in Figure S26.

Summary of selected working parameters of the constructed OLEDs together with the comparison with the other literature examples of OLEDs comprising aromatic dendrimers are presented in Table S4.

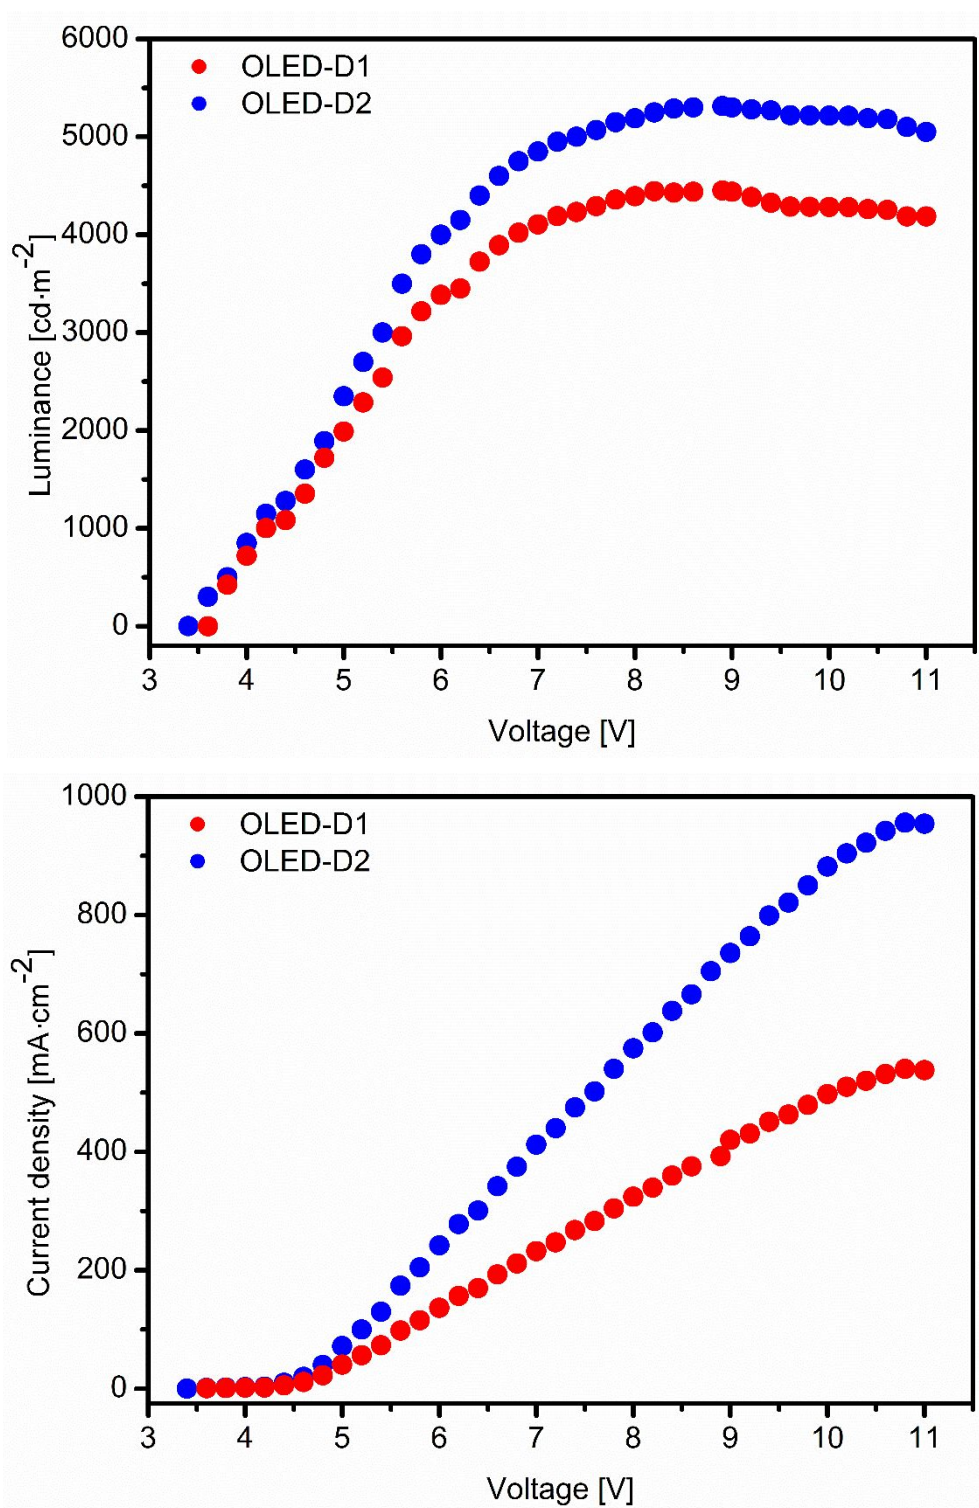

**Figure S26.** Luminescence-voltage (L-V) (top) and current density-voltage (J-V) (bottom) profiles for device OLED-D1 (red) and OLED-D2 (blue).

**Table S4.** Summary of selected working parameters of the constructed OLEDs together with the comparison with the other literature examples of OLEDs comprising aromatic dendrimers.

| Device                                                                            | Emmision maximum [nm] | Maximum external quantum efficiency [%] | Turn-on-voltage [V] | Maximum luminance [cd·m <sup>-2</sup> ] | Ref.             |
|-----------------------------------------------------------------------------------|-----------------------|-----------------------------------------|---------------------|-----------------------------------------|------------------|
| <b>OLED-D1</b>                                                                    | 380                   | 0.85                                    | 3.6                 | 4302                                    | <b>This work</b> |
| <b>OLED-D2</b>                                                                    | 410                   | 2.82                                    | 3.4                 | 5585                                    | <b>This work</b> |
| <i>Literature examples of other OLED devices comprising an aromatic dendrimer</i> |                       |                                         |                     |                                         |                  |
| Compound                                                                          | Emmision maximum [nm] | Maximum external quantum efficiency [%] | Turn-on-voltage [V] | Maximum luminance [cd·m <sup>-2</sup> ] | Ref.             |
| Pyrene-containing 1,3,5-triazine based dendrimers                                 | 451-460               | 0.97                                    | 3.5                 | 1273-4306                               | [4]              |
| Phenoxazine-containing 1,3,5-triazine based dendrimers                            | 520-580               | Not given                               | Not given           | Not given                               | [5]              |
| Carbazole-containing 1,3,5-triazine based dendrimers                              | 546-552               | 1.2-6.5                                 | 2.4-2.7             | 7942-25085                              | [6]              |
| Carbazole-containing 1,3,5-triazine based dendrimers                              | 500-550               | 2.8-20.6                                | 3.0-3.2             | 1441-8963                               | [7]              |
| Fluorene-containing 1,3,5-triazine based dendrimers                               | 436-460               | 0.83-0.99                               | 3.0-3.5             | 1610-3093                               | [8]              |

## S7. References

- [1] Su, F.; Mathew, S. C.; Mohlmann, L.; Antonietti, M.; Wang, X.; Blechert, S. Aerobic Oxidative Coupling of Amines by Carbon Nitride Photocatalysis with Visible Light. *Angew. Chem. Int. Ed.* **2011**, *50*, 657–660.
- [2] Bohra, H.; Li, P.; Yang, C.; Zhao, Y.; Wang, M. “Greener” and modular synthesis of triazine-based conjugated porous polymers via direct arylation polymerization: structure–function relationship and photocatalytic application. *Polym. Chem.* **2018**, *9*, 1972–1982.
- [3] Makuła, P.; Pacia, M.; Macyk, W. How To Correctly Determine the Band Gap Energy of Modified Semiconductor Photocatalysts Based on UV–Vis Spectra. *J. Phys. Chem. Lett.* **2018**, *9*, 6814–6817.
- [4] Li, Y. F.; Xie, X.; Gong, H. J.; Liu, M. L.; Chen, R. F.; Gao, D. Q.; Huang, W. Two bipolar blue-emitting fluorescent materials based on 1,3,5-triazine and peripheral pyrene for light-emitting diodes. *Dyes Pigm.* **2017**, *145*, 43–53.
- [5] Tanaka, H.; Shizu, K.; Nakanotani, H.; Adachi, C. Twisted intramolecular charge transfer state for long-wavelength thermally activated delayed fluorescence. *Chem. Mater.* **2013**, *25*, 3766–3771.
- [6] Sun, K.; Sun, Y.; Huang, T.; Luo, J.; Jiang, W.; Sun, Y. Design strategy of yellow thermally activated delayed fluorescent dendrimers and their highly efficient non-doped solution-processed OLEDs with low driving voltage. *Org. Electron.* **2017**, *42*, 123–130.
- [7] Ma, Z.; Wan, Y.; Dong, W.; Si, Z.; Duan, Q.; Shao, S. Alkoxy encapsulation of carbazole-based thermally activated delayed fluorescent dendrimers for highly efficient solution-processed organic light emitting diodes. *Chin. Chem. Lett.* **2021**, *32*, 703–707.
- [8] Ren, S.; Zeng, D.; Zhong, H.; Wang, Y.; Qian, S.; Fang, Q. Star-Shaped Donor- $\pi$ -Acceptor Conjugated Oligomers with 1,3,5-Triazine Cores: Convergent Synthesis and Multifunctional Properties. *J. Phys. Chem. B* **2010**, *114*, 10374–10383.
